# Supplementary material for: Circulating interleukin-6 and cancer: A meta-analysis using Mendelian randomization
Source: PubMed Central journal article supplement (PMC4476043; doi:10.1038/srep11394), 2015-06-22
Supplement: srep11394-s1.pdf [file srep11394-s1.pdf]

## **Circulating interleukin-6 and cancer: A meta-analysis using Mendelian randomization**

Geng Tian<sup>1,\*,#</sup>, Jia Mi<sup>1,\*</sup>, Xiaodan Wei<sup>1,\*</sup>, Dongmei Zhao<sup>2</sup>, Lingyan Qiao<sup>3</sup>, Chunhua Yang<sup>1</sup>, Xianglin Li<sup>1</sup>, Shuping Zhang<sup>4</sup>, Xuri Li<sup>1</sup>, Bin Wang<sup>5,#</sup>

### **Author affiliations:**

<sup>1</sup>Medicine and Pharmacy Research Center, Binzhou Medical University, Laishan District, Yantai, Shandong, China; <sup>2</sup>Institute of Anatomy, Binzhou Medical University, Laishan District, Yantai, Shandong, China; <sup>3</sup>Clinic Institute, Binzhou Medical University, Laishan District, Yantai, Shandong, China; <sup>4</sup>Institute of Pharmacology, Binzhou Medical University, Laishan District, Yantai, Shandong, China. <sup>5</sup>Institute of Molecular Imaging, Binzhou Medical University, Laishan District, Yantai, Shandong, China.

### **Correspondence should be addressed to:**

Geng Tian, M.D. Ph.D. or Bin Wang, M.D. Ph.D.

No. 346, Guanhai Road, Laishan District Yantai 264003, Shandong, China.

Tel: 86 0535 6913395; Fax: 86 0535 6913075;

E-mail: tiangengshandong@yeah.net (G.T.) and wangbindoctor2015@163.com (B.W.).

## Supplementary PRISMA Checklist

| Section/topic                      | #  | Checklist item                                                                                                                                                                                                                                                                                              | Reported section                                                                                    |
|------------------------------------|----|-------------------------------------------------------------------------------------------------------------------------------------------------------------------------------------------------------------------------------------------------------------------------------------------------------------|-----------------------------------------------------------------------------------------------------|
| <b>TITLE</b>                       |    |                                                                                                                                                                                                                                                                                                             |                                                                                                     |
| Title                              | 1  | Identify the report as a systematic review, meta-analysis, or both.                                                                                                                                                                                                                                         | Title page                                                                                          |
| <b>ABSTRACT</b>                    |    |                                                                                                                                                                                                                                                                                                             |                                                                                                     |
| Structured summary                 | 2  | Provide a structured summary including, as applicable: background; objectives; data sources; study eligibility criteria, participants, and interventions; study appraisal and synthesis methods; results; limitations; conclusions and implications of key findings; systematic review registration number. | Abstract                                                                                            |
| <b>INTRODUCTION</b>                |    |                                                                                                                                                                                                                                                                                                             |                                                                                                     |
| Rationale                          | 3  | Describe the rationale for the review in the context of what is already known.                                                                                                                                                                                                                              | Introduction (1 <sup>st</sup> and 2 <sup>nd</sup> paragraphs)                                       |
| Objectives                         | 4  | Provide an explicit statement of questions being addressed with reference to participants, interventions, comparisons, outcomes, and study design (PICOS).                                                                                                                                                  | Introduction (3 <sup>rd</sup> paragraph)                                                            |
| <b>METHODS</b>                     |    |                                                                                                                                                                                                                                                                                                             |                                                                                                     |
| Protocol and registration          | 5  | Indicate if a review protocol exists, if and where it can be accessed (e.g., Web address), and, if available, provide registration information including registration number.                                                                                                                               | Methods/Search strategy                                                                             |
| Eligibility criteria               | 6  | Specify study characteristics (e.g., PICOS, length of follow-up) and report characteristics (e.g., years considered, language, publication status) used as criteria for eligibility, giving rationale.                                                                                                      | Methods/Inclusion/exclusion criteria                                                                |
| Information sources                | 7  | Describe all information sources (e.g., databases with dates of coverage, contact with study authors to identify additional studies) in the search and date last searched.                                                                                                                                  | Methods/Search strategy                                                                             |
| Search                             | 8  | Present full electronic search strategy for at least one database, including any limits used, such that it could be repeated.                                                                                                                                                                               | Methods/Search strategy                                                                             |
| Study selection                    | 9  | State the process for selecting studies (i.e., screening, eligibility, included in systematic review, and, if applicable, included in the meta-analysis).                                                                                                                                                   | Figure 1                                                                                            |
| Data collection process            | 10 | Describe method of data extraction from reports (e.g., piloted forms, independently, in duplicate) and any processes for obtaining and confirming data from investigators.                                                                                                                                  | Methods/Data extraction                                                                             |
| Data items                         | 11 | List and define all variables for which data were sought (e.g., PICOS, funding sources) and any assumptions and simplifications made.                                                                                                                                                                       | Methods/Data extraction and Methods/Quality assessment, Table 1, Table 2 and Supplementary Table S1 |
| Risk of bias in individual studies | 12 | Describe methods used for assessing risk of bias of individual studies (including specification of whether this was done at the study or outcome level), and how this information is to be used in any data synthesis.                                                                                      | Methods/Statistics                                                                                  |
| Summary measures                   | 13 | State the principal summary measures (e.g., risk ratio, difference in means).                                                                                                                                                                                                                               | Methods/Statistics                                                                                  |
| Synthesis of results               | 14 | Describe the methods of handling data and combining results of studies, if done, including measures of consistency (e.g., $I^2$ ) for each meta-analysis.                                                                                                                                                   | Methods/Statistics                                                                                  |
| Risk of bias across studies        | 15 | Specify any assessment of risk of bias that may affect the cumulative evidence (e.g., publication bias, selective reporting within studies).                                                                                                                                                                | Methods/Statistics                                                                                  |
| Additional analyses                | 16 | Describe methods of additional analyses (e.g., sensitivity or subgroup analyses, meta-regression), if done, indicating which were pre-specified.                                                                                                                                                            | Methods/Statistics                                                                                  |

|                               |    |                                                                                                                                                                                                          |                                                                                                                        |
|-------------------------------|----|----------------------------------------------------------------------------------------------------------------------------------------------------------------------------------------------------------|------------------------------------------------------------------------------------------------------------------------|
| <b>RESULTS</b>                |    |                                                                                                                                                                                                          |                                                                                                                        |
| Study selection               | 17 | Give numbers of studies screened, assessed for eligibility, and included in the review, with reasons for exclusions at each stage, ideally with a flow diagram.                                          | Figure 1 and Results/Eligible articles                                                                                 |
| Study characteristics         | 18 | For each study, present characteristics for which data were extracted (e.g., study size, PICOS, follow-up period) and provide the citations.                                                             | Results/Study characteristics, Table 1 and Table 2                                                                     |
| Risk of bias within studies   | 19 | Present data on risk of bias of each study and, if available, any outcome level assessment (see item 12).                                                                                                | Table 3 and Results/Prediction of -174G/C variant for cancer risk                                                      |
| Results of individual studies | 20 | For all outcomes considered (benefits or harms), present, for each study: (a) simple summary data for each intervention group (b) effect estimates and confidence intervals, ideally with a forest plot. | Table 3 and Figure 3                                                                                                   |
| Synthesis of results          | 21 | Present results of each meta-analysis done, including confidence intervals and measures of consistency.                                                                                                  | Results/Prediction of -174G/C variant for cancer risk and Results/Changes of circulating IL-6 across -174G/C genotypes |
| Risk of bias across studies   | 22 | Present results of any assessment of risk of bias across studies (see Item 15).                                                                                                                          | Table 3 and Figure 2                                                                                                   |
| Additional analysis           | 23 | Give results of additional analyses, if done (e.g., sensitivity or subgroup analyses, meta-regression [see Item 16]).                                                                                    | Results/Predicted causality of circulating IL-6 for cancer and Results/Sensitivity analysis                            |
| <b>DISCUSSION</b>             |    |                                                                                                                                                                                                          |                                                                                                                        |
| Summary of evidence           | 24 | Summarize the main findings including the strength of evidence for each main outcome; consider their relevance to key groups (e.g., healthcare providers, users, and policy makers).                     | Discussion (1 <sup>st</sup> paragraph)                                                                                 |
| Limitations                   | 25 | Discuss limitations at study and outcome level (e.g., risk of bias), and at review-level (e.g., incomplete retrieval of identified research, reporting bias).                                            | Discussion (5 <sup>th</sup> paragraph)                                                                                 |
| Conclusions                   | 26 | Provide a general interpretation of the results in the context of other evidence, and implications for future research.                                                                                  | Discussion (6 <sup>th</sup> paragraph)                                                                                 |
| <b>FUNDING</b>                |    |                                                                                                                                                                                                          |                                                                                                                        |
| Funding                       | 27 | Describe sources of funding for the systematic review and other support (e.g., supply of data); role of funders for the systematic review.                                                               | Grant support                                                                                                          |

From: Moher D, Liberati A, Tetzlaff J, Altman DG, The PRISMA Group (2009). Preferred Reporting Items for Systematic Reviews and Meta-Analyses: The PRISMA Statement. PLoS Med 6(6): e1000097. doi:10.1371/journal.pmed1000097.

**Supplementary Table S1.** Quality assessment of all study groups and genotype distributions of *IL-6* gene -174G/C variant

| Author (year)            | Q1 | Q2 | Q3 | Q4 | Q5 | Q6 | Q7 | Quality score | <i>IL-6</i> gene -174G/C |      |      |          |      |      | H-W P |
|--------------------------|----|----|----|----|----|----|----|---------------|--------------------------|------|------|----------|------|------|-------|
|                          |    |    |    |    |    |    |    |               | Cases                    |      |      | Controls |      |      |       |
|                          |    |    |    |    |    |    |    |               | GG                       | GC   | CC   | GG       | GC   | CC   |       |
| Slattery (2014)          | 1  | 2  | 1  | 1  | 1  | 1  | 2  | 9             | 2011                     | 1556 | 0    | 2330     | 1827 | 0    | 0.000 |
| Mandal (2014) a          | 1  | 0  | 0  | 1  | 0  | 1  | 1  | 4             | 50                       | 28   | 6    | 26       | 30   | 22   | 0.043 |
| Mandal (2014) b          | 1  | 0  | 0  | 1  | 0  | 2  | 1  | 5             | 58                       | 16   | 6    | 48       | 14   | 0    | 0.316 |
| Cil (2014)               | 2  | 2  | 1  | 1  | 1  | 2  | 2  | 11            | 110                      | 63   | 17   | 113      | 85   | 18   | 0.722 |
| Tindall (2012)           | 2  | 2  | 1  | 1  | 0  | 2  | 2  | 10            | 275                      | 399  | 144  | 238      | 360  | 136  | 1.000 |
| Giannitrapani (2011) a   | 2  | 1  | 1  | 1  | 0  | 2  | 1  | 8             | 66                       | 21   | 8    | 51       | 37   | 10   | 0.402 |
| Giannitrapani (2011) b   | 2  | 1  | 1  | 1  | 0  | 2  | 1  | 8             | 63                       | 36   | 6    | 51       | 37   | 10   | 0.402 |
| Gaur (2011)              | 1  | 2  | 1  | 0  | 0  | 2  | 2  | 8             | 98                       | 35   | 7    | 65       | 41   | 14   | 0.069 |
| Abuli (2011)             | 1  | 1  | 1  | 0  | 0  | 2  | 2  | 7             | 586                      | 635  | 184  | 593      | 623  | 172  | 0.672 |
| Cacev (2010)             | 2  | 1  | 1  | 1  | 1  | 2  | 1  | 9             | 64                       | 70   | 26   | 68       | 75   | 17   | 0.582 |
| Ognjanovic (2010)        | 2  | 1  | 1  | 1  | 1  | 1  | 2  | 9             | 173                      | 74   | 22   | 357      | 136  | 43   | 0.000 |
| Hawken (2010)            | 2  | 1  | 1  | 1  | 0  | 2  | 2  | 9             | 381                      | 557  | 195  | 373      | 539  | 213  | 0.461 |
| Dossus (2010) a          | 1  | 1  | 1  | 1  | 1  | 1  | 2  | 8             | 2847                     | 2523 | 820  | 3707     | 3324 | 1035 | 0.000 |
| Dossus (2010) b          | 1  | 1  | 1  | 1  | 1  | 1  | 2  | 8             | 3594                     | 3218 | 1125 | 3832     | 3402 | 1274 | 0.000 |
| Tsilidis (2009)          | 1  | 1  | 1  | 1  | 0  | 2  | 2  | 8             | 68                       | 93   | 39   | 113      | 170  | 71   | 0.627 |
| Ozgen (2009)             | 1  | 1  | 1  | 1  | 0  | 1  | 2  | 7             | 21                       | 14   | 7    | 143      | 171  | 26   | 0.009 |
| Ognjanovic (2009)        | 1  | 1  | 1  | 1  | 1  | 1  | 2  | 8             | 71                       | 46   | 0    | 103      | 118  | 0    | 0.000 |
| Gangwar (2009)           | 1  | 1  | 1  | 1  | 1  | 2  | 2  | 9             | 107                      | 36   | 17   | 142      | 51   | 7    | 0.372 |
| Falleti (2009)           | 1  | 2  | 1  | 1  | 0  | 2  | 2  | 9             | 102                      | 98   | 19   | 102      | 103  | 31   | 0.536 |
| Cherel (2009)            | 2  | 1  | 1  | 1  | 0  | 2  | 2  | 9             | 102                      | 131  | 60   | 29       | 58   | 25   | 0.695 |
| Vasku (2009)             | 1  | 1  | 1  | 0  | 0  | 2  | 1  | 6             | 32                       | 46   | 22   | 31       | 47   | 22   | 0.601 |
| Talar-Wojnarowska (2009) | 1  | 0  | 1  | 1  | 0  | 2  | 1  | 6             | 33                       | 33   | 21   | 22       | 19   | 9    | 0.191 |
| Slattery (2009)          | 2  | 1  | 1  | 1  | 0  | 1  | 2  | 8             | 631                      | 696  | 246  | 728      | 897  | 347  | 0.015 |

|                      |   |   |   |   |   |   |   |    |     |     |     |     |     |     |       |
|----------------------|---|---|---|---|---|---|---|----|-----|-----|-----|-----|-----|-----|-------|
| Andrie (2009)        | 1 | 1 | 1 | 1 | 0 | 2 | 2 | 8  | 55  | 23  | 3   | 47  | 30  | 4   | 0.777 |
| Aladzcity (2009)     | 2 | 2 | 1 | 1 | 0 | 2 | 2 | 10 | 37  | 43  | 17  | 36  | 49  | 14  | 0.681 |
| Birmann (2009)       | 2 | 2 | 1 | 1 | 1 | 2 | 2 | 11 | 21  | 46  | 10  | 52  | 82  | 28  | 0.655 |
| Wilkening (2008)     | 2 | 2 | 1 | 1 | 1 | 2 | 2 | 11 | 79  | 163 | 61  | 162 | 297 | 121 | 0.481 |
| Vairaktaris (2008)   | 1 | 1 | 1 | 1 | 1 | 2 | 2 | 9  | 42  | 102 | 18  | 90  | 60  | 6   | 0.298 |
| Upadhyay (2008)      | 1 | 1 | 1 | 1 | 0 | 2 | 2 | 8  | 135 | 28  | 5   | 131 | 64  | 6   | 0.586 |
| Slattery (2008) b    | 2 | 2 | 1 | 1 | 1 | 1 | 2 | 10 | 430 | 741 | 0   | 407 | 917 | 0   | 0.000 |
| Slattery (2008) a    | 2 | 2 | 1 | 1 | 1 | 1 | 2 | 10 | 389 | 459 | 0   | 186 | 265 | 0   | 0.000 |
| Kesarwani (2008)     | 1 | 1 | 1 | 1 | 0 | 2 | 2 | 8  | 102 | 84  | 14  | 103 | 87  | 10  | 0.120 |
| Crusius (2008)       | 2 | 2 | 1 | 1 | 0 | 1 | 2 | 9  | 140 | 224 | 75  | 415 | 517 | 206 | 0.044 |
| Colakogullari (2008) | 1 | 1 | 1 | 1 | 1 | 2 | 1 | 8  | 10  | 29  | 5   | 27  | 22  | 9   | 0.222 |
| Bao (2008)           | 1 | 1 | 1 | 1 | 0 | 0 | 1 | 5  | 136 | 0   | 0   | 120 | 0   | 0   | NA    |
| Vogel (2008)         | 2 | 2 | 1 | 1 | 0 | 2 | 2 | 10 | 105 | 202 | 96  | 204 | 361 | 179 | 0.437 |
| Kury (2008)          | 1 | 1 | 1 | 1 | 0 | 2 | 2 | 8  | 363 | 489 | 171 | 435 | 504 | 182 | 0.079 |
| Ennas (2008)         | 2 | 2 | 1 | 1 | 0 | 2 | 2 | 10 | 17  | 16  | 6   | 64  | 43  | 5   | 0.506 |
| Ahirwar (2008)       | 1 | 1 | 1 | 1 | 0 | 1 | 2 | 7  | 86  | 24  | 26  | 130 | 56  | 14  | 0.027 |
| Vishnoi (2007) a     | 1 | 1 | 1 | 1 | 0 | 2 | 2 | 8  | 36  | 9   | 0   | 62  | 18  | 2   | 0.618 |
| Vishnoi (2007) b     | 1 | 1 | 1 | 1 | 0 | 2 | 2 | 8  | 61  | 16  | 2   | 91  | 26  | 1   | 0.561 |
| Litovkin (2007) a    | 1 | 1 | 1 | 1 | 0 | 2 | 2 | 8  | 26  | 39  | 8   | 30  | 39  | 9   | 0.490 |
| Litovkin (2007) b    | 1 | 1 | 1 | 1 | 0 | 2 | 2 | 8  | 18  | 25  | 17  | 30  | 39  | 9   | 0.490 |
| Gonullu (2007)       | 1 | 1 | 1 | 1 | 0 | 1 | 2 | 7  | 15  | 17  | 6   | 14  | 3   | 7   | 0.000 |
| Vogel (2007)         | 1 | 1 | 1 | 1 | 0 | 2 | 2 | 8  | 108 | 167 | 86  | 98  | 177 | 86  | 0.728 |
| Vogel (2007)         | 2 | 2 | 1 | 1 | 0 | 2 | 2 | 10 | 98  | 168 | 89  | 204 | 364 | 185 | 0.371 |
| Slattery (2007) a    | 2 | 2 | 1 | 1 | 1 | 1 | 2 | 10 | 631 | 696 | 246 | 728 | 897 | 347 | 0.015 |
| Slattery (2007) b    | 2 | 2 | 1 | 1 | 1 | 2 | 2 | 11 | 321 | 347 | 109 | 411 | 438 | 146 | 0.098 |
| Nearman (2007)       | 1 | 1 | 1 | 1 | 0 | 2 | 2 | 8  | 9   | 15  | 4   | 181 | 141 | 40  | 0.128 |
| Gatti (2007)         | 1 | 1 | 1 | 1 | 0 | 2 | 2 | 8  | 42  | 13  | 1   | 23  | 27  | 6   | 0.642 |
| Duch (2007)          | 1 | 1 | 1 | 1 | 0 | 2 | 1 | 7  | 28  | 22  | 2   | 35  | 23  | 2   | 0.442 |

|                         |   |   |   |   |   |   |   |    |      |      |     |      |      |     |       |
|-------------------------|---|---|---|---|---|---|---|----|------|------|-----|------|------|-----|-------|
| Deans (2007)            | 2 | 2 | 1 | 1 | 0 | 2 | 2 | 10 | 71   | 83   | 43  | 79   | 101  | 44  | 0.258 |
| Berkovic (2007)         | 1 | 1 | 1 | 1 | 0 | 2 | 2 | 8  | 25   | 44   | 11  | 69   | 75   | 18  | 0.724 |
| Vairaktaris (2006)      | 1 | 1 | 1 | 1 | 0 | 2 | 2 | 8  | 42   | 102  | 18  | 90   | 60   | 6   | 0.298 |
| Theodoropoulos (2006)   | 1 | 1 | 1 | 1 | 0 | 2 | 2 | 8  | 111  | 76   | 35  | 64   | 86   | 50  | 0.055 |
| Nogueira (2006)         | 1 | 1 | 1 | 1 | 1 | 1 | 2 | 8  | 24   | 32   | 0   | 148  | 102  | 3   | 0.001 |
| Michaud (2006)          | 2 | 2 | 1 | 1 | 1 | 2 | 2 | 11 | 170  | 223  | 91  | 230  | 293  | 90  | 0.832 |
| Kamangar (2006)         | 2 | 2 | 1 | 1 | 0 | 1 | 2 | 9  | 21   | 54   | 27  | 51   | 58   | 43  | 0.004 |
| Gonzalez-Zuloeta (2006) | 1 | 1 | 1 | 1 | 0 | 2 | 2 | 8  | 55   | 86   | 30  | 1286 | 1733 | 632 | 0.246 |
| Balasubramanian (2006)  | 1 | 1 | 1 | 1 | 0 | 2 | 2 | 8  | 170  | 244  | 83  | 168  | 235  | 87  | 0.759 |
| Rothman (2006)          | 2 | 2 | 1 | 1 | 0 | 2 | 2 | 10 | 1097 | 1470 | 499 | 1277 | 1658 | 564 | 0.506 |
| Lan (2006)              | 2 | 2 | 1 | 1 | 0 | 2 | 2 | 10 | 211  | 231  | 68  | 241  | 264  | 85  | 0.358 |
| Gunter (2006)           | 1 | 1 | 1 | 1 | 1 | 2 | 2 | 9  | 79   | 90   | 35  | 83   | 81   | 26  | 0.385 |
| Gaustadnes (2006)       | 1 | 1 | 1 | 1 | 0 | 2 | 2 | 8  | 64   | 115  | 51  | 184  | 263  | 93  | 0.979 |
| Cozen (2006)            | 2 | 2 | 1 | 1 | 0 | 1 | 2 | 9  | 85   | 61   | 0   | 75   | 50   | 0   | 0.005 |
| Seifart (2005)          | 1 | 1 | 1 | 1 | 0 | 2 | 2 | 8  | 74   | 82   | 26  | 90   | 107  | 46  | 0.163 |
| Migita (2005)           | 1 | 1 | 1 | 1 | 0 | 0 | 1 | 5  | 48   | 0    | 0   | 188  | 0    | 0   | NA    |
| Leibovici (2005)        | 1 | 1 | 1 | 1 | 0 | 2 | 2 | 8  | 134  | 200  | 110 | 175  | 200  | 68  | 0.387 |
| Hefler (2005)           | 1 | 1 | 1 | 1 | 0 | 2 | 2 | 8  | 78   | 139  | 52  | 91   | 105  | 31  | 0.935 |
| Basturk (2005)          | 1 | 1 | 1 | 1 | 1 | 1 | 2 | 8  | 15   | 10   | 0   | 27   | 13   | 9   | 0.007 |
| Snoussi (2005)          | 1 | 1 | 1 | 1 | 0 | 2 | 1 | 7  | 199  | 98   | 8   | 150  | 46   | 4   | 0.830 |
| Skerrett (2005)         | 2 | 2 | 1 | 1 | 0 | 2 | 2 | 10 | 74   | 13   | 1   | 88   | 14   | 0   | 0.931 |
| Mazur (2005)            | 1 | 1 | 1 | 1 | 0 | 2 | 1 | 7  | 11   | 31   | 12  | 16   | 28   | 6   | 0.239 |
| Festa (2005)            | 1 | 1 | 1 | 1 | 0 | 2 | 1 | 7  | 57   | 126  | 58  | 62   | 130  | 68  | 0.993 |
| Cordano (2005)          | 1 | 1 | 1 | 1 | 0 | 2 | 2 | 8  | 134  | 197  | 77  | 106  | 184  | 59  | 0.167 |
| Campa (2005)            | 2 | 2 | 1 | 1 | 0 | 2 | 2 | 10 | 629  | 954  | 412 | 615  | 993  | 374 | 0.448 |
| Zhang (2004)            | 1 | 1 | 1 | 1 | 0 | 2 | 1 | 7  | 57   | 126  | 58  | 62   | 130  | 68  | 0.993 |
| Smith (2004)            | 1 | 1 | 1 | 1 | 0 | 2 | 1 | 7  | 57   | 67   | 20  | 79   | 101  | 44  | 0.258 |
| Campa (2004)            | 2 | 2 | 1 | 1 | 0 | 2 | 2 | 10 | 64   | 111  | 68  | 55   | 105  | 47  | 0.818 |

|                  |   |   |   |   |   |   |   |    |     |     |    |     |     |    |       |
|------------------|---|---|---|---|---|---|---|----|-----|-----|----|-----|-----|----|-------|
| Bushley (2004)   | 2 | 2 | 1 | 1 | 1 | 1 | 2 | 10 | 143 | 34  | 5  | 163 | 46  | 9  | 0.020 |
| Landi (2003)     | 2 | 2 | 1 | 1 | 0 | 2 | 2 | 10 | 133 | 180 | 48 | 145 | 133 | 33 | 0.761 |
| El-Omar (2003) a | 2 | 2 | 1 | 1 | 0 | 2 | 2 | 10 | 33  | 39  | 18 | 83  | 98  | 28 | 0.913 |
| El-Omar (2003) b | 2 | 2 | 1 | 1 | 0 | 2 | 2 | 10 | 55  | 52  | 16 | 83  | 98  | 28 | 0.913 |
| Hwang (2003) a   | 1 | 1 | 1 | 1 | 1 | 0 | 1 | 6  | 30  | 0   | 0  | 30  | 0   | 0  | NA    |
| Hwang (2003) b   | 1 | 1 | 1 | 1 | 1 | 2 | 1 | 8  | 19  | 9   | 2  | 22  | 8   | 0  | 0.393 |
| Howell (2003)    | 1 | 1 | 1 | 1 | 0 | 2 | 1 | 7  | 48  | 79  | 34 | 79  | 101 | 44 | 0.258 |
| Zheng (2000)     | 1 | 1 | 1 | 1 | 0 | 2 | 1 | 7  | 22  | 36  | 15 | 33  | 69  | 26 | 0.357 |

*Abbreviations:* H-W P, P value for Hardy–Weinberg equilibrium test.

For “Q1: Representativeness of cases”, 2 denotes “Consecutive/randomly selected from case population with clearly defined random frame”, 1 denotes “Consecutive/randomly selected from case population without clearly defined random frame or with extensive inclusion criteria” and 0 denotes “Method of selection not described”. For “Q2: Representativeness of controls”, 2 denotes “Controls were consecutive/randomly drawn from the same area (ward/community) as cases with the same criteria”, 1 denotes “Controls were consecutive/randomly drawn from a different area than cases” and 0 denotes “Not described”. For “Q3: Ascertainment of cancer cases”, 1 denotes “Clearly described objective criteria for diagnosis of cancer” and 0 denotes “Not described”. For “Q4: Ascertainment of controls”, 2 denotes “Clinical examinations were performed on controls to prove that controls did not have cancer”, 1 denotes “Article merely stated that controls were subjects who did not have cancer; no proof provided” and 0 denotes “Not described”. For “Q5: Ascertainment of genotyping examination”, 1 denotes “Genotyping done under “blind” conditions” and 0 denotes “Unblinded or not mentioned”. For “Q6: Test for Hardy–Weinberg equilibrium”, 2 denotes “Hardy–Weinberg equilibrium in control group”, 1 denotes “Hardy–Weinberg disequilibrium in control group” and 0 denotes “Hardy–Weinberg equilibrium not checked”. For “Q7: Association assessment”, 2 denotes “Assessed association between genotypes and cancer with appropriate statistic and adjusting confounders”, 1 denotes “Assessed association between genotypes and cancer with appropriate statistic without adjusting confounders” and 0 denotes “Inappropriate statistic used”.
